# Supplementary material for: Elastic nanomembrane metrology at fluid–fluid interfaces using axisymmetric drop shape analysis with anisotropic surface tensions: deviations from Young–Laplace equation
Source: Royal Society of Chemistry journal article supplement (doi:10.1039/c2sm26604k), 2012-01-01
Supplement: c2sm26604k.pdf [file c2sm26604k.pdf]

Supplementary Material for “**Elastic nanomembrane metrology at fluid/fluid interfaces using axisymmetric drop shape analysis with anisotropic surface tensions: deviations from Young-Laplace equation**” by James K. Ferri et al.

**Isotropic Interfacial tension and Flat Disc Membrane.**

Figure S1 compares the shapes calculated by equations (2) and (3), the Young-Laplace equation, and equations (5) and (6), the anisotropic surface stress equations, which are identical.

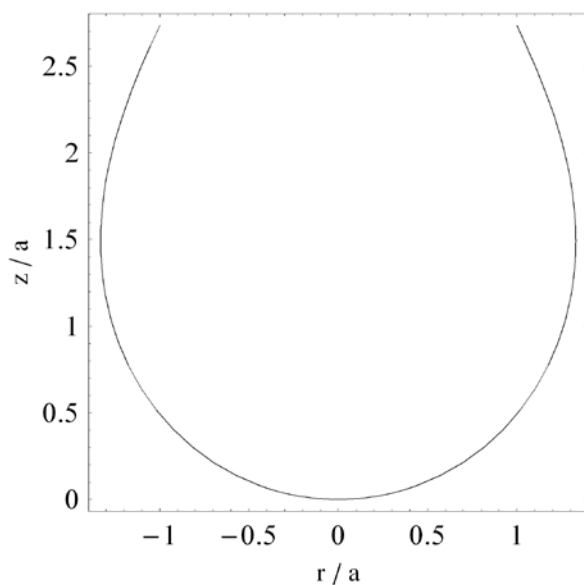

**Figure S1.** No deformation; linear elastic interface equation (4a).  $\lambda_1=\lambda_2=1$ ;  $G_s=100$  mN/m;  $\nu_s=0$ ;  $R_0=1320 \text{ m}^{-1}$ ;  $\Delta\rho=997 \text{ kg m}^{-3}$ ;  $\gamma(\Gamma)=50 \text{ mN/m}$ .

**Linear elastic nanomembranes at axisymmetric fluid/fluid interfaces: effect of surface shear modulus on surface deformation.**

From Figure S2, it is seen that the meridional stretching ( $\lambda_l$ ) is maximum at the drop apex and that as the surface shear modulus increases, non-monotonic behavior develops in ( $\lambda_2$ ). However, in all cases, the magnitude of the stretches is similar.

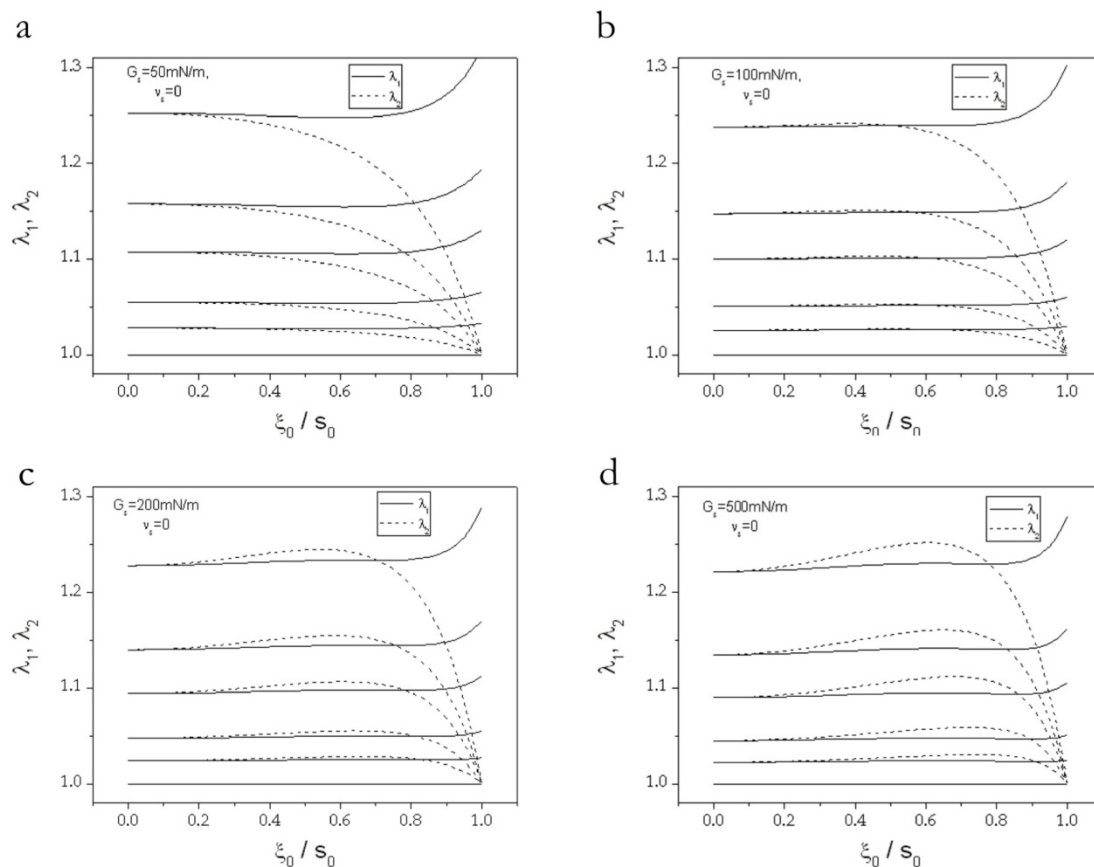

**Figure S2.** Effect of surface shear modulus on principal stretches,  $\lambda_1$  (—) and  $\lambda_2$  (---):  $G_s$  = (a) 50, (b) 100, (c) 200, (d) 500 mN/m,  $v_s = 0$ ; for all calculations  $\alpha = 0, 0.1, 0.2, 0.3, 0.4$  and  $0.5$ .  $R_0 = 1320 \text{ m}^{-1}$ ,  $\Delta\rho = 997 \text{ kgm}^{-3}$ ,  $\gamma(T) = 50 \text{ mN/m}$ .

### Shape differences between surfaces with anisotropic stresses and the Young-Laplace equation.

Figure S3 shows the sum of the radial error as a function of inflation for different surface Poisson ratios. The figure confirms that the error, which results from using the Young-Laplace equation to describe an anisotropic surface, increases with increasing incompressibility (i.e. a greater value of  $\nu_s$ ). Although these errors are small in magnitude, it is clear that they are systematic, demonstrating the inherent deviations between the Young-Laplace equation and the case of anisotropic stress distributions.

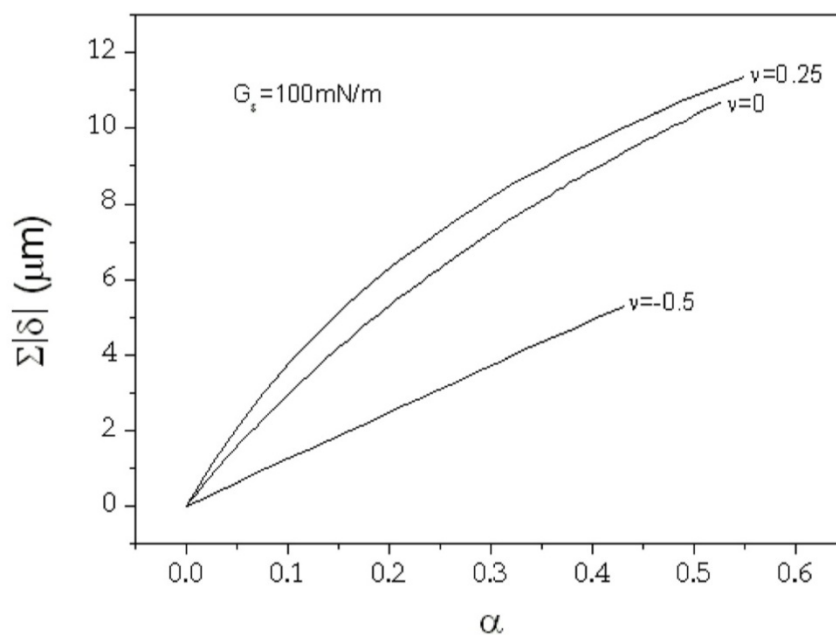

**Figure S3.** Sum of Young-Laplace error as a function of the surface Poisson ratio of the membrane,  $\nu_s$ ;  $G_s = 100 \text{ mN/m}$ ,  $\nu_s = -0.5, 0, 0.25$ .
